# Supplementary material
Source: PubMed Central journal article supplement (PMC3693549)
Supplement: NIHMS486556-supplement-01.pdf [file NIHMS486556-supplement-01.pdf]

Table S1 (Supplemental Data)

*Between-Group Differences in Baseline Demographic, Clinical, and Medication Characteristics Among Patients Treated with Cognitive Enhancement Therapy or Enriched Supportive Therapy.*

| Variable                                        | CET      |           | EST      |           | <i>p</i> <sup>a</sup> |
|-------------------------------------------------|----------|-----------|----------|-----------|-----------------------|
|                                                 | (N = 31) |           | (N = 27) |           |                       |
|                                                 | <i>M</i> | <i>SD</i> | <i>M</i> | <i>SD</i> |                       |
| <b>Demographics</b>                             |          |           |          |           |                       |
| Age                                             | 25.88    | 6.46      | 25.97    | 6.26      | .955                  |
| Male (N / %)                                    | 20       | 65%       | 20       | 74%       | .617                  |
| Caucasian (N / %)                               | 21       | 68%       | 19       | 70%       | .662                  |
| Completed College (N / %)                       | 9        | 29%       | 10       | 37%       | .713                  |
| Employed (N / %)                                | 8        | 26%       | 7        | 26%       | .772                  |
| Schizophrenia (N / %)                           | 21       | 68%       | 17       | 63%       | .916                  |
| Years Since First Psychotic Symptom             | 3.07     | 2.34      | 3.32     | 2.16      | .675                  |
| IQ                                              | 97.74    | 7.66      | 98.52    | 9.74      | .736                  |
| <b>Symptoms</b>                                 |          |           |          |           |                       |
| BPRS Total                                      | 39.77    | 9.21      | 40.70    | 10.64     | .723                  |
| Wing Negative Symptoms Scale                    | 18.35    | 4.14      | 18.15    | 3.63      | .842                  |
| Raskin Depression Scale                         | 6.77     | 2.77      | 6.33     | 1.98      | .494                  |
| Covi Anxiety Scale                              | 5.84     | 2.08      | 6.11     | 2.22      | .632                  |
| <b>Treatment Exposure/Adherence<sup>b</sup></b> |          |           |          |           |                       |
| Total Hours of Treatment                        | 162.27   | 43.40     | 45.80    | 17.99     | < .001                |
| % Sessions Missed                               | 11.29    | 6.97      | 16.29    | 15.14     | .141                  |
| <b>Medications</b>                              |          |           |          |           |                       |
| Dose (baseline, cpz)                            | 405.38   | 339.95    | 460.68   | 335.05    | .536                  |
| Dose (year 1, cpz)                              | 402.33   | 332.93    | 529.38   | 374.13    | .215                  |
| Dose (year 2, cpz)                              | 473.58   | 384.43    | 548.71   | 402.05    | .520                  |
| Using Atypical Agent (baseline, N / %)          | 31       | 100%      | 26       | 96%       | .944                  |
| Using Atypical Agent (year 1, N / %)            | 25       | 100%      | 24       | 100%      | .886                  |
| Using Atypical Agent (year 2, N / %)            | 24       | 100%      | 22       | 100%      | .768                  |
| Compliant (baseline, N / %)                     | 28       | 90%       | 24       | 89%       | .800                  |
| Compliant (year 1, N / %)                       | 25       | 100%      | 20       | 83%       | .108                  |
| Compliant (year 2, N / %)                       | 22       | 92%       | 19       | 86%       | .918                  |

*Note.* CET = Cognitive Enhancement Therapy, BPRS = Brief Psychiatric Rating Scale, EST = Enriched Supportive Therapy.

<sup>a</sup> $\chi^2$  test or independent *t*-test, two-tailed, for significant differences between CET and EST participants.

<sup>b</sup>N = 49, as treatment exposure/adherence data were not collected from individuals who withdrew from treatment before one year.
